# Supplementary material for: Combined inhibition of PIM and CDK4/6 suppresses both mTOR signaling and Rb phosphorylation and potentiates PI3K inhibition in cancer cells
Source: PubMed Central journal article supplement (PMC7197449; doi:10.18632/oncotarget.27539), 2020-04-28
Supplement: oncotarget-11-1478-s001.pdf [file oncotarget-11-1478-s001.pdf]

## Combined inhibition of PIM and CDK4/6 suppresses both mTOR signaling and Rb phosphorylation and potentiates PI3K inhibition in cancer cells

### SUPPLEMENTARY MATERIALS

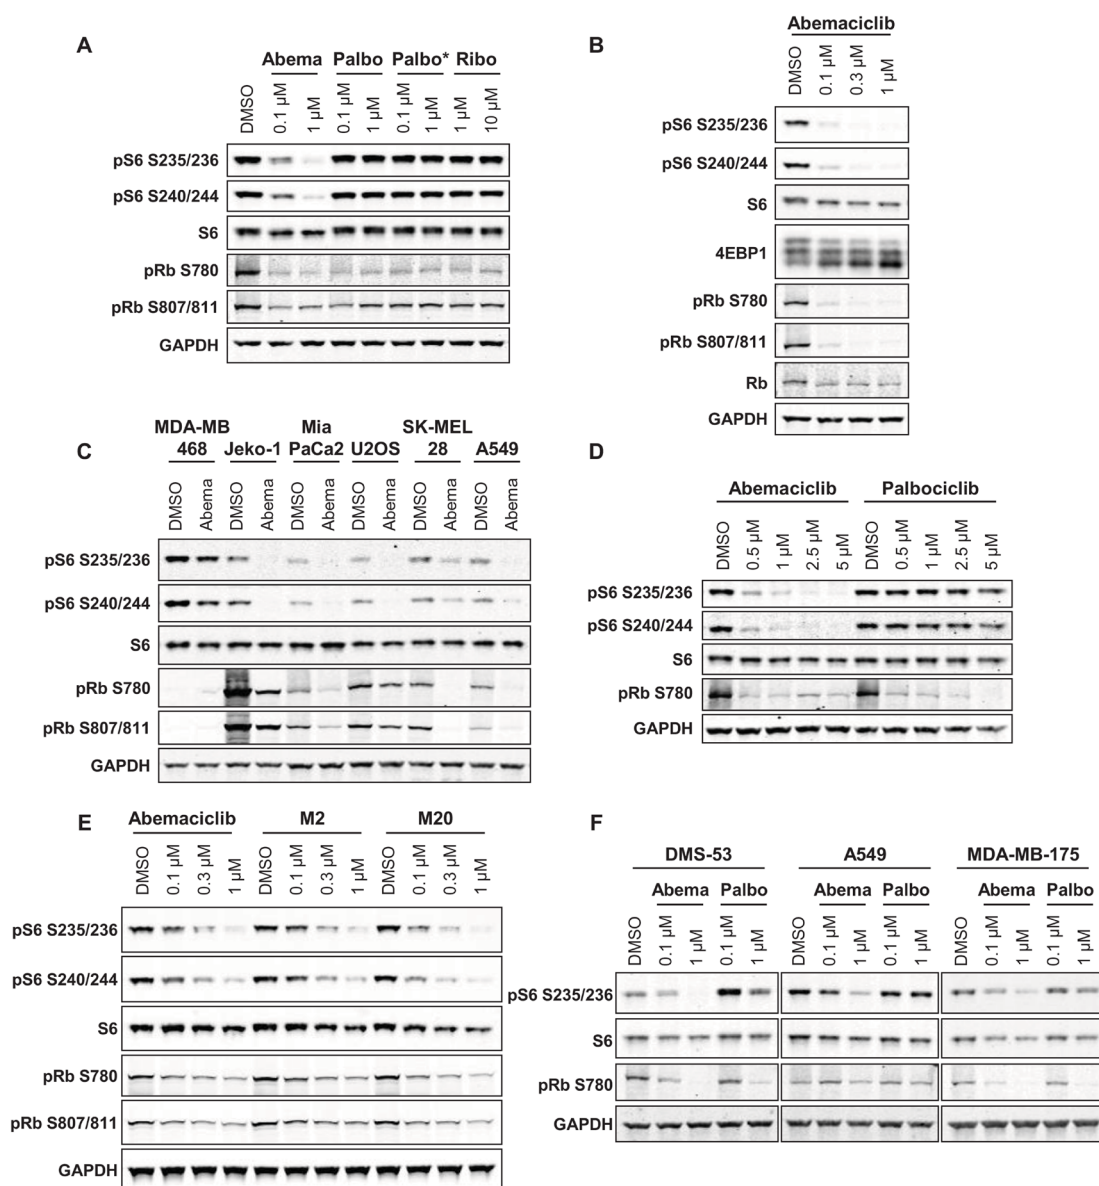

**Supplementary Figure 1: Abemaciclib inhibits S6 phosphorylation.** (A) DMS-53 cells were treated with abemaciclib, palbociclib, or ribociclib for 4 h and analyzed by western blot. \*palbociclib from Selleck Chemicals (S1579). (B) DMS-53 cells were treated with abemaciclib for 24 h and analyzed by western blot. (C) The indicated cell lines were treated with 0.5  $\mu$ M abemaciclib for 24 h and analyzed by western blot. (D) A549 cells were treated with abemaciclib or palbociclib for 24 h and analyzed by western blot. (E) DMS-53 cells were treated with abemaciclib or its metabolites M2 and M20 for 4 h and analyzed by western blot. (F) DMS-53, A549, and MDA-MB-175 cells were treated with abemaciclib or palbociclib for 24 h and analyzed by western blot.

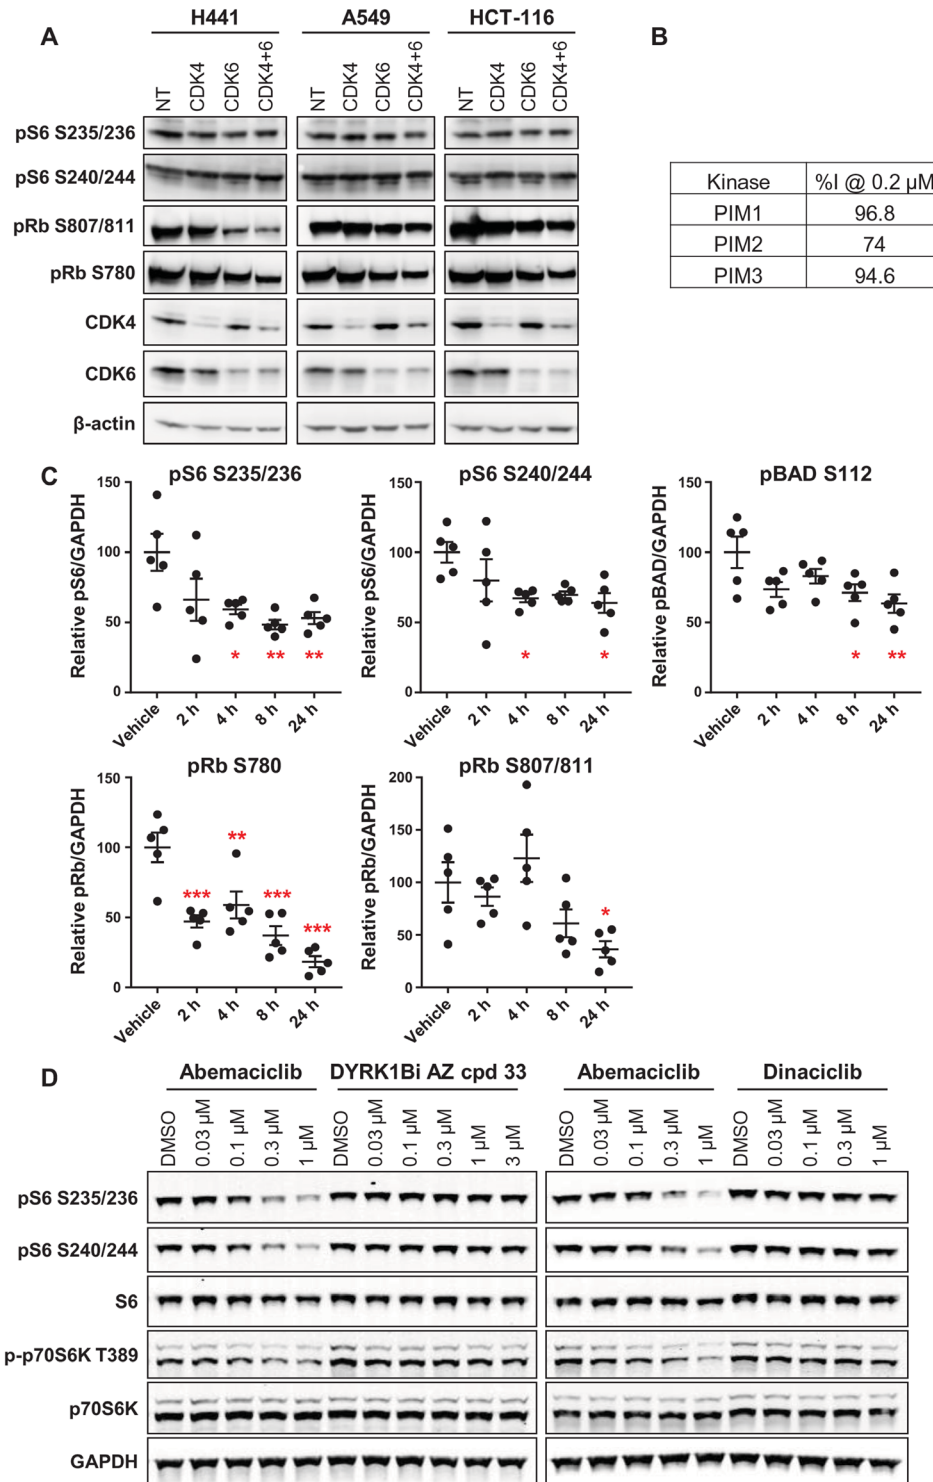

**Supplementary Figure 2: CDK4/6, DYRK1B, and CDK9 inhibition does not alter S6 phosphorylation/mTOR signaling.** (A) H441, A549, and HCT-116 cells were transfected with CDK4, CDK6, CDK4+CDK6, or non-targeting control (NT) siRNA and analyzed by western blot. (B) Inhibition of PIM kinases 1, 2, and 3 by abemaciclib via KINOMEScan analysis. (C) Mice bearing A549 xenograft tumors were treated with a single dose of abemaciclib (50 mg/kg). Tumors were collected 2, 4, 8, or 24 h post-treatment and analyzed by western blot. Plots indicate mean  $\pm$  SEM ( $n = 5$ /group), relative to vehicle control. \* $p < 0.05$ ; \*\* $p < 0.01$ ; \*\*\* $p < 0.001$ . (D) DMS-53 cells were treated with abemaciclib, DYRK1B inhibitor AZ cpd33, or dinaciclib for 4 h and analyzed by western blot.

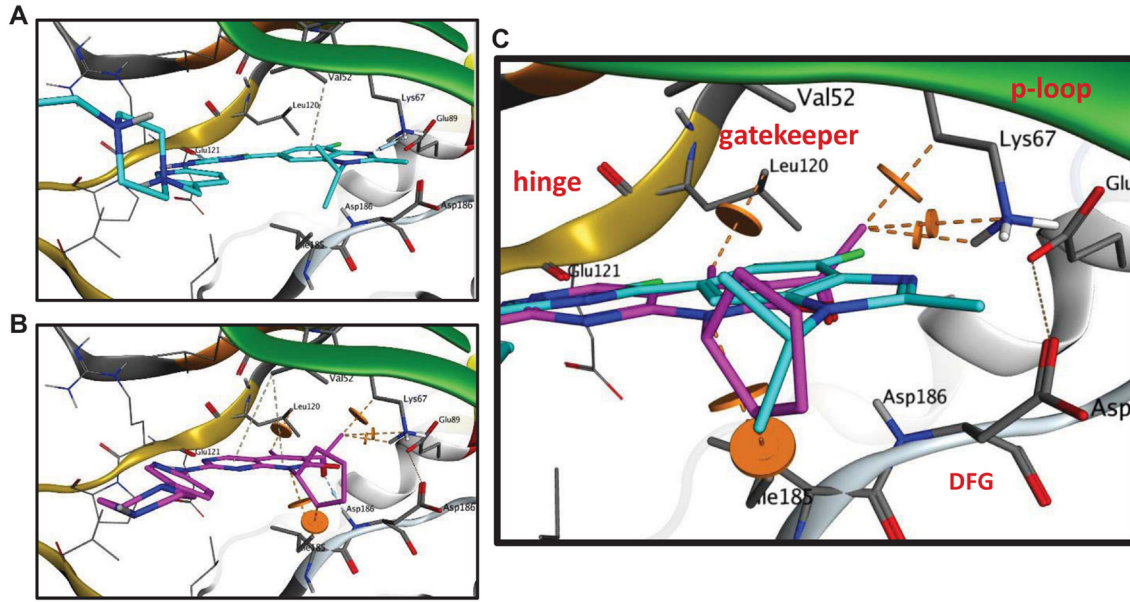

**Supplementary Figure 3: Structural modeling of PIM1 with abemaciclib or palbociclib.** (A) Abemaciclib predicted binding mode in ATP PIM1 pocket showed a hydrophobic interaction with Val52 in the p-loop represented by a gray dotted line and several polar H-bond interactions with Glu121 (hinge) and Lys67 (catalytic Lys) represented by blue dotted lines. (B) Palbociclib predicted binding pose showed multiple clashes inside the ATP PIM1 pocket represented by orange disks. (C) Comparison between abemaciclib and palbociclib in the equivalent binding mode (only clashes were represented).

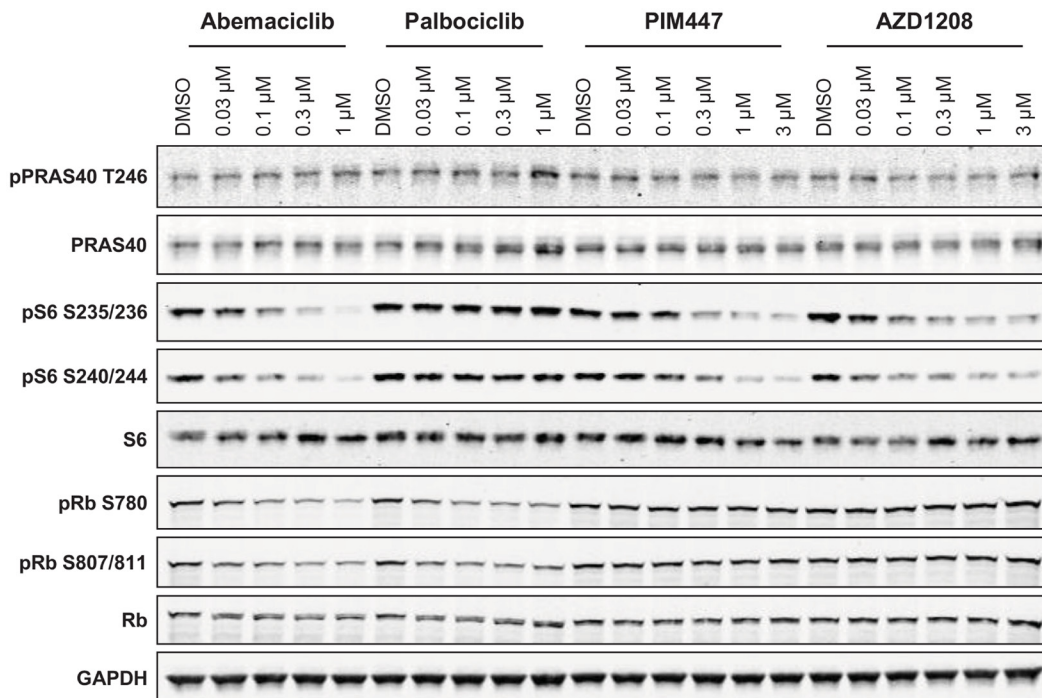

**Supplementary Figure 4: Abemaciclib and PIM inhibitors do not alter PRAS40 phosphorylation.** DMS-53 cells were treated with the indicated concentrations of abemaciclib, palbociclib, or PIM inhibitors PIM447 and AZD1208 for 4 h and analyzed by western blot.

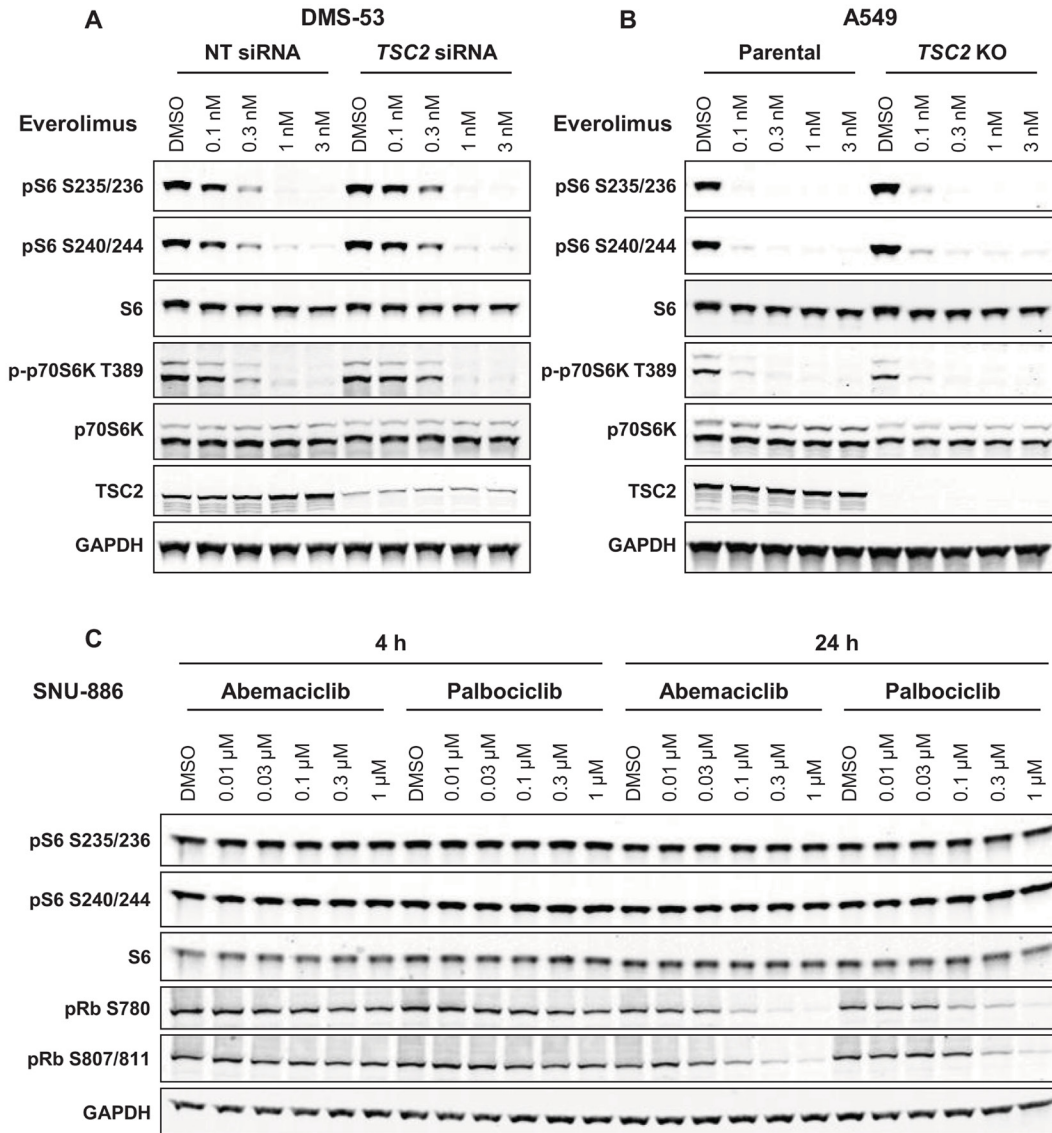

**Supplementary Figure 5: *TSC2* is required for inhibition of S6 phosphorylation by abemaciclib but not by everolimus.** (A) DMS-53 cells were transfected with *TSC2* or non-targeting control (NT) siRNA for 48 h, treated with everolimus for 4 h, and analyzed by western blot. (B) A549 parental or *TSC2* KO cells were treated and analyzed as in A. (C) *TSC2* mutant SNU-886 cells were treated with abemaciclib or palbociclib for 4 or 24 h and analyzed by western blot.

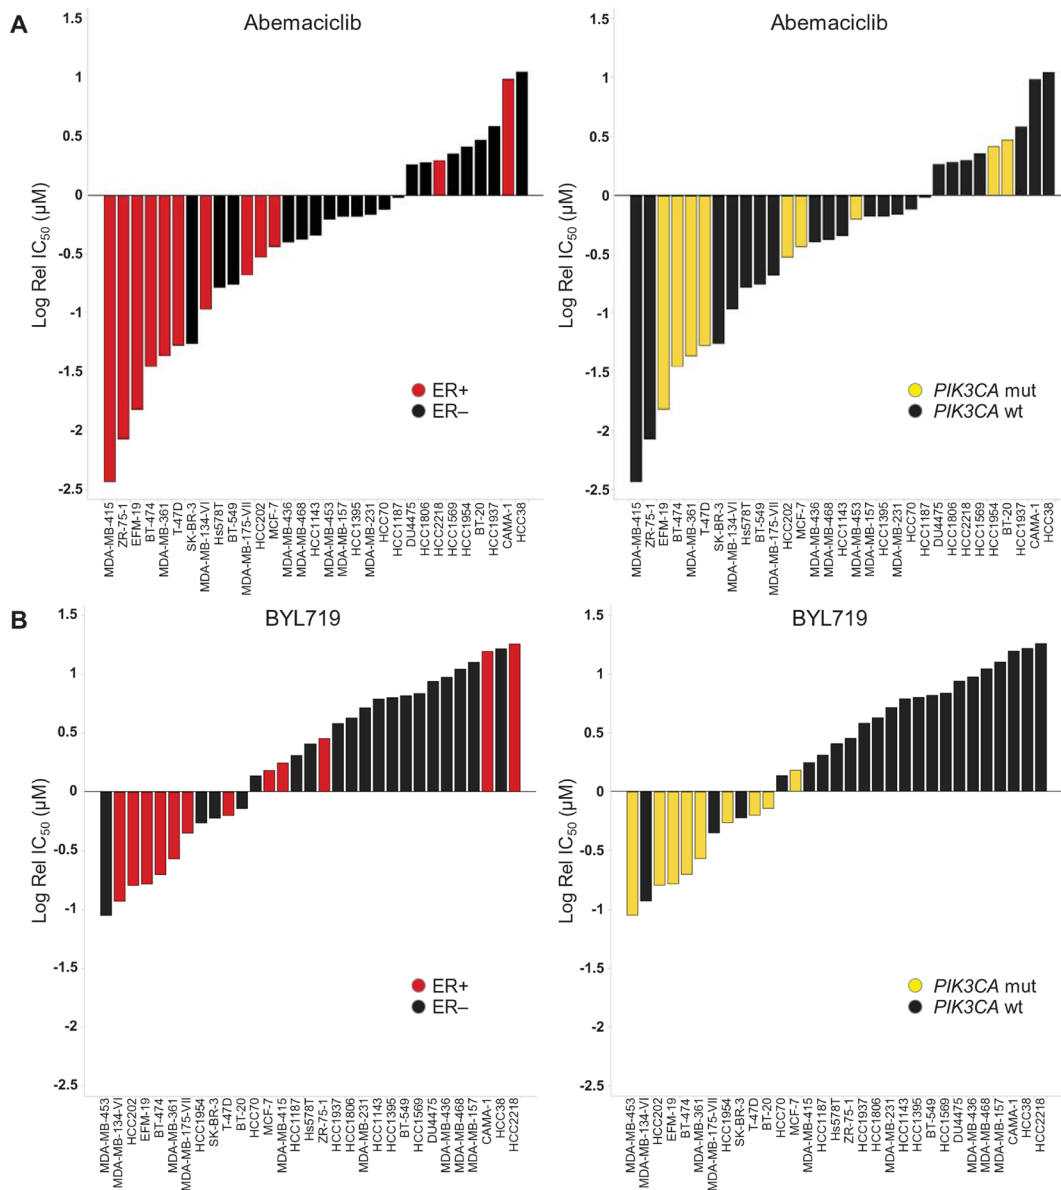

**Supplementary Figure 6: Inhibition of breast cancer cell growth by single-agent abemaciclib or BYL719.** A panel of 31 breast cancer cell lines was treated with single-agent abemaciclib (A) or PI3K inhibitor BYL719 (B) for 2DT and cell growth was assessed by PI staining. Log Rel  $IC_{50}$  ( $\mu$ M) values and ER expression/*PIK3CA* mutational status are displayed.



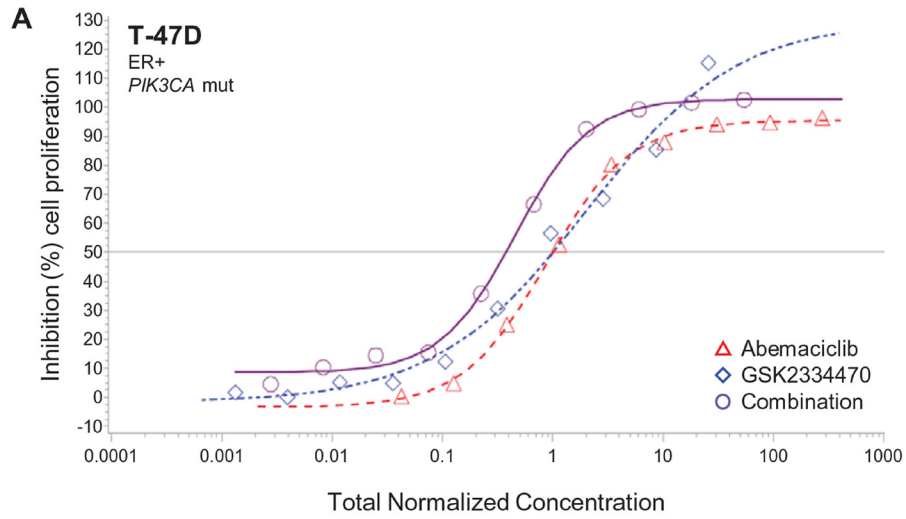

| Cell Line | Combination Index |
|-----------|-------------------|
| T-47D     | 0.377             |

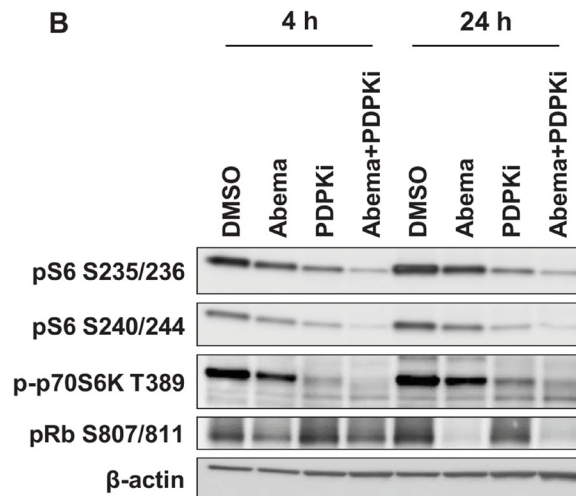

**Supplementary Figure 7: Combination treatment with abemaciclib and PDPK inhibitor GSK2334470 synergistically inhibits breast cancer cell growth.** (A) T-47D cells were treated with the combination of abemaciclib and GSK2334470 for 2DT and cell growth was assessed by PI staining. Curve shift analysis was used to calculate a combination index (CI) as an indication of additivity or synergy between the compounds. (B) T-47D cells were treated with the combination of abemaciclib (0.5  $\mu$ M) and GSK2334470 (0.5  $\mu$ M) for 4 or 24 h and analyzed by western blot.
